# Supplementary material for: Predictive Factors for Chemoradiation-Induced Oral Mucositis and Dysphagia in Head and Neck Cancer: A Scoping Review
Source: Cancers (Basel). 2023 Dec 4;15(23):5705. doi: 10.3390/cancers15235705 (PMC10705154; doi:10.3390/cancers15235705)
Supplement: Supplementary file 1 [file cancers-15-05705-s001.zip › Table S1_Analysis of Included OM Studies.csv]

Endnote Ref	Ref #	# cases	# HNC cases	# NPC cases	% RT	% surg	% chemo	RT types	Outcome	Binary?	Outcome measure	RTOG/CTCAE/WHO G2+	RTOG/CTCAE/WHO G3+	Other	Outcome incidence	G3+ incidence	G2+ incidence	Clinician rated	Patient reported	Timeframe	Acute	Late	Sig. univariate features	Sig. multivariate features	Model features	Univariate only	gentic factor	oral cavity dose	mucosal surface dose	parotid dose	tongue dose	age	gender	treatment	tumour site	alcohol	bioelectrical impedance	smoking	BMI	T stage	N stage	weight loss	blood / saliva / microbiota features	CCRT	induction chemo	chemo drug	RT schedule / fractionation	field size	surgery
{Dean, 2016 #177}	19	351	351	?	100	?	29	?	Mucositis	1	CTCAE G3+		1	0	0.73	0.73		1	0	8 weeks post RT	0	1	N/A	N/A	oral cavity dose	0		model		model		model	model		model									model	model	model
{Alterovitz, 2011 #221}	29	28	28	?	100	?	100	?	Mucositis	1	WHO grade 2+ mucositis	1		0	?			1	0	acute	1	0	gene cluster	N/A	N/A	1	univariate
{Bentzen, 2001 #1967}	30	918	918	18	100	?	?	CHART vs CRT	Mucositis	1	Grade 3 mucositis		1	0	0.593681917	0.593681917		1	0	early	1	0	RT type	N/A	N/A	0								univariate													multivariate	multivariate
{Brzozowska, 2018 #1105}	32	62	62	?	100	73	44	IMRT	Mucositis	1	RTOG G3+		1	0	0.419	0.419		1	0	week 6 of RT	1	0	CC genotype surgery	CC genotype surgery	N/A	1	univariate																						univariate
{Brzozowska, 2018 #229}	33	58	58	?	100	?	?	IMRT	Mucositis	1	RTOG G3+		1	0	0.404	0.404		1	0	week 7	1	0	excessive alcohol consumption CCRT genetic factors	N/A	N/A	1	univariate							univariate		univariate
{Brzozowska, 2019 #242}	34	49	49	?	100	?	34.7	IMRT	Mucositis	1	RTOG G3+		1	0	?			1	0	week 4	1	0	bioelectrical impedance measurements	N/A	N/A	1											univariate
{Chen, 2015 #253}	35	77	77	0	42.9	100	57.1	?	Mucositis	1	WHO G3+		1	0	0.338	0.338		1	0	8 weeks	1	0	N/A	N/A	treatment modality treatment dose smoking history BMI	0								univariate				multivariate	univariate					univariate
{Chen, 2017 #2030}	36	114	114	114	100	?	100		Mucositis	1	RTOG G2+	1		0	0.657894737		0.657894737	1	0	acute - within 3 months of end of RT	1	0	N/A	T stage smoking status	N/A	0												multivariate		multivariate
{Chen, 2021 #215}	37	240	240		100	?	100	IMRT/TOMO	Mucositis	1	RTOG G3+		1	0	0.546	0.546		1	0	acute	1	0	Mean oral cavity dose Weekly CCRT Lower serum level of vitamin B2 and vitamin C	N/A	N/A	0		multivariate						univariate									multivariate	multivariate
{Correia, 2015 #334}	38	91	91	6	100	?	100	Cobalt RT	Mucositis	0	WHO G3+		1	0	0.38	0.38		1	0	?	1	0	HSV prevalence	N/A	N/A	1							univariate										univariate
{Deneuve, 2022 #131}	89	36	36	0	100	100	?	IMRT or VMAT or helical tomotherapy	Mucositis	1	CTCAEv4 G3+		1	0	0.22	0.22		1	0	acute	1	0	N/A	N/A	RADIODTECT (blood test) oral cavity dose parotid dose	0		model		model													model
{Desilets, 2022 #557}	39	181	181	0	100	?	100	?	Mucositis	1	CTCAE G3+		1	0	0.480662983	0.480662983		1	0	acute	1	0	genetic polymorphism	N/A	N/A	1	univariate
{Epstein, 2000 #288}	41	18	18	2	100	?	67	?	Mucositis	?	National Cancer Institute (NCI) grading + OMAS			1	?			1	0		1	0	saliva epidermal growth factor	N/A	N/A	1																	univariate
{Fanetti, 2021 #612}	42	179	179	?	100	?	100	IMRT	Mucositis	1	CTCAEv4 G3+		1	0	0.67	0.67		1	0	acute	1	0	Prognostic Nutritional Index	N/A	N/A	1
{Gu, 2020 #236}	43	190	190	?	100	27.9	84.2	?	Mucositis	0	mouth and throat soreness questionnaire			1	N/A			0	1	weekly	1	0	N/A	morning/afternoon RT	N/A	0							model	model				model											model
{Hanin, 2022 #466}	44	21	21	?	100	?	100	?	Mucositis	1	WHO G2+	1		0	?			1	0	day 30	1	0	oral microbiota	N/A	N/A	1																	univariate
{Hansen, 2020 #325}	22	802	802	?	100	?	38	?	Mucositis	1	CTCAEv3 G3+		1	0	?			1	0	acute	1	0	N/A	N/A	Treatment acceleration oral cavity dose gender smoking	0		model					model	univariate				model									model
{Homa-Mlak, 2021 #516}	45	207	207	0	100	100	74	IMRT	Mucositis	1	RTOG/EORTC G3+		1	0	?			1	0	during RT	1	0	white blood cell features	white blood cell features	N/A	0																	multivariate
{Jehmlich, 2015 #311}	46	50	50	1	100	32	78	?	Mucositis	1	CTCAEv3 G3+		1	0	0.82	0.82		1	0	during RT	1	0	saliva proteins	N/A	N/A	0																	model
{Kawashita, 2021 #101}	47	99	99	?	100	?	89	?	Mucositis	1	CTCAEv5 G3+		1	0	0.39	0.39		1	0	during RT	1	0	N/A	neutrophil-to-lymphoctye ratio	N/A	0												univariate					multivariate
{Kawashita, 2022 #56}	48	100	100	22	100	?	80	?	Mucositis	1	CTCAEv5 G3+		1	0	0.47	0.47		1	0		1	0	lymphocyte count	lymphocyte count	N/A	0																	multivariate
{Kazmierska, 2020 #90}	49	50	50	?	100	56	66	?	Mucositis	1	CTCAEv4/RTOG G3+		1	0	0.3	0.3		1	0	acute	1	0	None found	N/A	N/A	1																	univariate
{Le, 2017 #301}	50	30	30	30	100	?	87	?	Mucositis	1	CTCAEv3 G3+		1	0	?			1	0	acute	1	0	genetic feature	N/A	N/A	1	univariate
{Li, 2013 #357}	51	114	114	114	100	?	?		Mucositis	1	CTCAEv3 G3+		1	0	0.421052632	0.421052632		1	0		1	0	single nucleotide polymorphism	N/A	N/A	1	univariate
{Li, 2013 #457}	52	25	25	19	100	?	72	?	Mucositis	1	WHO G3+		1	0	0.4	0.4		1	0	Acute	1	0	blood - γ-H2AX-specific relative fluorescence		N/A	1																	univariate
{Li, 2017 #2556}	53	92	92		100	?	100	IMRT	Mucositis	1	RTOG G3+		1	0	0.207	0.207		1	0		1	0	N/A	body weight loss oral cavity dose mucosal surface dose	N/A	0		multivariate	multivariate													multivariate
{Li, 2020 #226}	21	270	270	270	100	?	87.5	IMRT / TOMO	Mucositis	1	RTOG G3+		1	0	0.3	0.3		1	0	acute	1	0	N/A	N/A	BMI retropharyngeal lymph node irradiation oral mucosa dose	0		model	model					univariate					model							model
{Li, 2021 #724}	54	500	500	0	100	?	?	?	Mucositis	1	RTOG G3+		1	0	0.474	0.474		1	0	right after RT	1	0	single nucleotide polymorphism	N/A	N/A	1	univariate
{Manur, 2020 #96}	55	40	40	0	100	35	77.5	3DCRT or IMRT	Mucositis	1	RTOG G3+		1	0	0.28	0.28		1	0	acute	1	0	PTV volume	N/A	N/A	1
{Mazzola, 2016 #31}	56	50	50	0	100	?	60	VMAT	Mucositis	1	RTOG G2+	1		0	0.5		0.5	1	0	?	1	0	Oral mucosa dose	Oral mucosa dose	N/A	0			multivariate													univariate		multivariate
{Mizuno, 2019 #276}	57	44	44	0	100	?	100	?	Mucositis	1	CTCAEv3 G3+		1	0	0.545	0.545		1	0	during Tx	1	0	N/A	N/A	renal dysfunction tumour site	0									model
{Mlak, 2020 #377}	58	60	60	4	100	73	?	IMRT	Mucositis	?	RTOG			1	varies			1	0	up to week 7	1	0	genetic feature	genetic feature	N/A	0	multivariate
{Morais-Faria, 2020 #1746}	59	44	44	?	100	?	?	?	Mucositis	0	CTCAEv4 G3+		1	0	N/A			1	0	21st fraction	1	0	patient age	N/A	N/A	1						univariate
{Musha, 2015 #351}	60	39	39	?	100	?	?	Carbon ion RT	Mucositis	?	CTCAEv4 + RTOG			1	?			1	0	acute	1	0	oral mucosa dose	N/A	N/A	1			univariate
{Musha, 2020 #118}	61	36	36	5	100	?	97	IMRT	Mucositis	1	CTCAEv4/RTOG G2+	1		0	0.44		0.44	1	0	acute	1	0	tongue dose	N/A	N/A	1					univariate
{Nejatinamini, 2018 #338}	62	28	28	?	100	7	71	?	Mucositis	1	CTCAEv3 G2+	1		0	0.52		0.52	1	0	during RT	1	0	vitamin intake plasma retinol BMI chemotherapy	N/A	N/A	0								multivariate					multivariate				multivariate
{Nishii, 2020 #293}	64	326	326	0	100	?	70.85889571	?	Mucositis	1	CTCAEv5 G3+		1	0	0.417	0.417		1	0	90 days from start RT	1	0	sex tumour site hemoglobin level leukocyte/lymphocytes levels chemo drug oral feeding	sex tumour site hemoglobin level leukocyte/lymphocytes levels chemo drug oral feeding	N/A	0							multivariate	multivariate	multivariate								multivariate	multivariate
{Orlandi, 2018 #84}	17	132	132	132	100	?	100	VMAT / IMRT	Mucositis	1	CTCAEv4 G3+		1	0	0.3	0.3		1	0	during RT	1	0	oral cavity dose parotid gland dose BMI	N/A	N/A	0		model		model									model
{Otter, 2015 #1828}	90	253	253	41	100	?	87	?	Mucositis	1	CTCAEv3 G3+		1	0	0.46	0.46		1	0	acute	1	0	N/A	oral mucosa dose	oral mucosa dose	0			multivariate
{Porock, 2004 #637}	65	53	53	3.021	100	?	?	?	Mucositis	0	RTOG			1	N/A			1	0	during RT	1	0	age smoking time from surgery to RT	N/A	N/A	1						univariate						univariate
{Rupe, 2022 #2266}	66	152	152	?	100	?	56.6	VMAT	Mucositis	1	CTCAEv4 G3+		1	0	0.237	0.237		1	0	at 40 Gy	1	0	tumour site chemotherapy leukopenia neutropenia lymphocytopenia	tumour site lymphocytopenia	N/A	0								univariate	multivariate								multivariate	univariate
{Saedi, 2019 #1018}	67	54	54	10	100	?	31.5	?	Mucositis	1	WHO G2+	1		0	0.33		0.33	1	0	acute	1	0	gender	N/A	N/A	1						univariate	univariate
{Saito, 2012 #2055}	68	33	33	0	100	?	?	?	Mucositis		CTCAEv3 G2+	1		0	0.606		0.606	1	0	during RT	1	0	BMI	N/A	N/A	1													univariate
{Saito, 2013 #219}	69	15	15	?	100	?	93	IMRT	Mucositis	1	CTCAEv3 G3+		1	0	0.36	0.36		1	0	6 weeks	1	0	CT perfusion blood flow CT perfusion transition time	N/A	N/A	1
{Sakamoto, 2017 #510}	70	170	170	0	31	?	100	?	Mucositis	1	CTCAEv3 G1+			1	0.611764706			1	0	acute	1	0	genetic feature radiotherapy	N/A	N/A	1	univariate												univariate
{Sakashita, 2015 #150}	71	43	43	?	100	?	100	?	Mucositis	1	CTCAEv3 G3+		1	0	?			1	0	acute	1	0	type of chemotherapy	N/A	N/A	1
{Sanches, 2020 #501}	72	135	135	?	100	?	?	?	Mucositis	0	WHO VAS			1	N/A			0	1	during RT	1	0	tissue electrical parameters	N/A	N/A	1											univariate
{Sanguineti, 2012 #1726}	73	164	164	0	100	?	65	IMRT	Mucositis	1	CTCAEv3 G3+		1	0	0.787	0.787		1	0	during RT	1	0	oral mucosa dose CCRT	oral mucosa dose CCRT	N/A	0			multivariate					univariate										multivariate
{Schack, 2022 #558}	74	1183	1183	?	100	?	40	?	Mucositis	0	LENT-SOMA			1	N/A			1	1	acute	1	0	genetic factor	N/A	N/A	1	univariate
{Schauer, 2010 #1575}	75	156	156	0	?	100	100	?	Mucositis	1	CTCAE G3+		1	0	0.141	0.141		1	0	during tx	1	0	interleukin levels	N/A	N/A	1																	univariate
{Soutome, 2021 #75}	76	181	181	0	100	?	63.5359116	3DCRT, IMRT	Mucositis	1	CTCAEv5 G3+		1	0	0.309392265	0.309392265		1	0	90 days from start RT	1	0	hemoglobin Chemo details number of teeth	hemoglobin Chemo details	N/A	0								model									model	model
{Srivastava, 2022 #370}	91	51	51	0	100	?	100	?	Mucositis	1	RTOG G3+		1	0	0.45	0.45		1	0	during RT	1	0	PD-L1_tumour (tumour protein from biopsy) PD-L1-TILs	N/A	N/A	1																	univariate
{Sunaga, 2021 #324}	77	94	94	4	100	?	65	standard RT or hyperfractionation	Mucositis	1	CTCAEv4 G3+		1	0	0.128	0.128		1	0	mid Tx	1	0	smoking history chemotherapy regime	smoking history chemotherapy regime	N/A	0								univariate				model						model
{Tao, 2017 #1869}	79	80	80	50	100	?	80	?	Mucositis	1	RTOG G2+	1		0	0.6875		0.6875	1	0	acute	1	0	N stage smoking diabetes history platelet count lymphocyte info CCRT	N stage smoking history parapharyngeal irradiation pretreatment platelet count	N/A	0								univariate				multivariate			multivariate		multivariate	univariate
{van den Broek, 2006 #110}	80	125	125	0	100	?	?	?	Mucositis		RTOG G3+		1	0	0.51	0.51		1	0	acute	1	0	tumour site	N/A	N/A	1									univariate
{Venkatesh, 2014 #526}	81	183	183	?	100	?	80.87431694	?	Mucositis	1	RTOG G3+		1	0	0.3879	0.3879		1	0	acute	1	0	Alcohol genetic polymorphism	genetic polymorphism	N/A	0	multivariate									univariate
{Werbrouck, 2009 #1933}	92	88	88	0	100	26.13636364	39.77272727	IMRT	Mucositis	1	CTCAE G3+		1	0	0.340909091	0.340909091		1	0	during RT	1	0	oral cavity dose genetic polymorphism	N/A	N/A	1		univariate
{Wu, 2022 #231}	83	42	42	17	100	28.6	50	?	Mucositis	1	CTCAEv3 G3+		1	0	0.547619048	0.547619048		1	0	< 90 days post treatment	1	0	serum gastrin-17 (enzyme) in blood	N/A	N/A	0																	multivariate
{Yang, 2019 #723}	85	468	468	468	100	?	74.6	?	Mucositis	1	RTOG G3+		1	0	0.517	0.517		1	0	acute?	1	0	gentic polymorphisms	N/A	N/A	1	univariate
{Yang, 2020 #93}	86	1467	1467	1467	100	?	76	IMRT, CRT	Mucositis	1	RTOG G3+		1	0	0.2379	0.2379		1	0	acute	1	0	genetic features	N/A	N/A	0	multivariate
{Yu, 2016 #667}	87	188	188	188	100	?	80	?	Mucositis	1	RTOG/EORTC G3+		1	0	0.473	0.473		1	0	acute	1	0	genetic polymorphism	N/A	N/A	0	multivariate
{Zahn, 2012 #179}	88	40	40	?	100	?	82.5	?	Mucositis	0	CTCAEv3			1	0.5			1	0	during RT	1	0	nutrition goals	nutrition goals tumour site	N/A	1									univariate
{Zhu, 2017 #209}	16	41	41	41	100	?	59	3D CRT	Mucositis	1	RTOG			1	0.32			1	0	acute	1	0	oral bacteria	N/A	N/A	1																	univariate
{Bjarnason, 2009 #500}	31	205	205	?	100	?	?		Mucositis	1	RTOG G3+		1	0	0.575609756	0.575609756		1	0		?	?	time of RT (morning vs afternoon)	N/A	N/A	1								univariate
{Devaraju, 2009 #1643}	40	90	90	0	100	?	100	?	Mucositis	0	?			1	N/A			?	?	?	?	?	N/A	N/A	age erythrocyte sedimentation rate WHO performance status T stage smoking history	1						univariate						univariate		univariate			univariate
{Nguyen, 2020 #200}	63	48	48	3	100	?	?	?	Mucositis	0	National Cancer Institute (NCI) grading			1	N/A			1	0	?	?	?	blood microcirculaton oral blood perfusion oral	N/A	N/A	1
{Sharabiani, 2021 #169}	18	169	169	?	100	?	87	SIB-IMRT	Mucositis	1	CTCAEv3 G3+		1	0	0.355029586	0.355029586		1	0	?	?	?	N/A	N/A	NTCP	0		model
{Suresh, 2010 #224}	78	218	218	?	100	?	?	?	Mucositis	?	?			1	0.75			?	?	?	?	?	N/A	N/A	Age ECOG White blood count erythrocyte sedimentation rate albumin cancer stage	0						model								model	model		model
{Vera-Llonch, 2006 #125}	82	450	450	40.95	100	?	44.2	?	Mucositis	0	varies			1	N/A			?	?		?	?	Tumour site RT dose CCRT	N/A	N/A	0						univariate			multivariate									multivariate			univariate
{Yahya, 2016 #194}	84	66	66	0	100	?	?	IMRT	Mucositis	1	CTCAEv3 G3+		1	0	1	1		1	0	?	?	?	None found	N/A	N/A	1
{Al-Qadami, 2023 #2928}	24	20	20	0	100	52.63157895	21.05263158	VMAT	Mucositis	1	CTCAEv5 G3+		1	0	0.47	0.47		1	0	?	?	?	chemotherapy gut microbiota	N/A	N/A	1																	univariate	univariate
{Bansal, 2022 #2929}	25	52	52	0	100	?	100	VMAT	Mucositis	1	CTCAEv4 G3+		1	0	0.576	0.576		1	0		1	0	T stage Weight loss Treatment break Oral mucosa dose	Oral mucosa dose Weight loss	N/A	0			multivariate													multivariate
{Chung, 2023 #2931}	26	42	42	42	100	?	100	?	Mucositis	0	WHO gradings mild moderate severe			1	N/A			1	0	During treatment	1	0	nasopharynx microbiota	N/A	N/A	1																	univariate
{Dong, 2023 #2933}	23	242	242	242	100	0	88.8		Mucositis	1	CTCAE		1	0	0.211	0.211		1	0		1	0	N/A	N/A	GTVnp radiomics + dosiomics	0						univariate						multivariate		multivariate				univariate
{Liu, 2023 #2934}	20	190	190	190	100	?	92.63157895	IMRT	Mucositis	1	WHO score 3+		1	0	0.473684211	0.473684211		1	0	0	1	0	T-stage Oral mucosa dose Parotid dose	age Nstage IC_cycles oral cavity dose	age Nstage IC_cycles oral cavity dose	0		model				model								univariate	model				model
{Lv, 2023 #2939}	27	82	82	82	100	?	100	IMRT	Mucositis	1	RTOG G2+	1		0	0.756097561		0.756097561	1	0		1	0	time of RT	N/A	N/A	1
{Xu, 2023 #2941}	28	100	100	24	100	?	100		Mucositis	1	WHO score 3+		1	0	0.66	0.66		1	0		1	0	salivary epidermal growth factor inflammatory cytokines	N/A	N/A	1																	univariate
[truncated: 17 more columns]
