# Supplementary material for: Predictive Factors for Chemoradiation-Induced Oral Mucositis and Dysphagia in Head and Neck Cancer: A Scoping Review
Source: Cancers (Basel). 2023 Dec 4;15(23):5705. doi: 10.3390/cancers15235705 (PMC10705154; doi:10.3390/cancers15235705)
Supplement: Supplementary file 1 [file cancers-15-05705-s001.zip › Table S2_Analysis of Included Dysphagia Studies.csv]

Endnote Ref	Ref #	# cases	# HNC cases	# NPC cases	% RT	% surg	% chemo	RT types	Outcome	Binary?	Outcome measure	RTOG/CTCAE G2+	RTOG/CTCAE G3+	Tube Feeding (indication or use) Y/N	VF/MBS/aspiration/stricture	Patient reported / MDADI	Outcome incidence	Tube feeding incidence	G3+ incidence	G2+ incidence	Clinician rated	Patient reported	Timeframe	Acute	Late	Sig. univariate features	Sig. multivariate features	Model features	Univariate only	Constrictor dose	IPC	MPC	SPC	Treatment related	Tumour site inc. neck disease	Age	Gender	Oral cavity dose / oral mucosa dose	T stage	N stage	Pretreatment dysphagia	Mucositis severity/duration	Larynx dose	Smoking history	Oesophagus dose	Oesophageal inlet dose / cricopharnygeaus	Parotids dose	Submandibular gland dose	Tongue/base of tongue dose/genioglossus/geniohyoid
{Awan, 2014 #155}	111	38	38	0	100	?	37	?	Dysphagia	0	Modified Barium Swallow asssessment				1		0.315789474				1	0	4 years	0	1	Mean constrictor dose	N/A	N/A	0	univariate			multivariate						univariate								univariate
{Barnhart, 2017 #32}	112	80	80	6	100	?	60	IMRT / CRT	Dysphagia	1	Tube feeding			1			0.04	0.04			1	0	6 month post RT	0	1	N/A	N/A	N/A	1
{Barnhart, 2017 #32}	112	80	80	6	100	?	60	IMRT / CRT	Dysphagia	0	FOIS					1					0	1	6 month post RT	0	1	T stage	N/A	N/A	1					univariate					univariate
{Bhide, 2009 #52}	115	37	37	4	100	?	100	IMRT	Dysphagia	1	MDADI					1	N/A				1	0	1 year	0	1	N/A	N/A	N/A	1
{Caudell, 2009 #127}	117	122	122	3	100	?	87.7	IMRT	Dysphagia	1	PEG dependence OR aspiration OR stricture			1	1		0.385	0.385			1	0	long term	0	1	tumour site CCRT age RT schedule	age CCRT tumour site	N/A	0					univariate	multivariate	multivariate
{Caudell, 2010 #310}	118	83	83	7	100	?	?	IMRT	Dysphagia	1	PEG dependence OR aspiration OR stricture			1	1		0.265	0.265			1	0	long term	0	1	larynx dose constrictor dose	tumour site pretreatment dysphagia T stage current smoker	N/A	0	multivariate		multivariate	multivariate		multivariate				multivariate		univariate		univariate	multivariate
{Chera, 2017 #72}	120	45	45	0	100	?	100	IMRT	Dysphagia	1	CTCAE-PRO					1	N/A				0	1	6months onwards	0	1	Parotid + submandibular gland dose Constrictor dose	N/A	N/A	1																		univariate	univariate
{Christianen, 2012 #234}	103	354	354	14	100	?	?	3DCRT, IMRT	Dysphagia	1	RTOG/EORTC G2+	1					?				1	0	6 month	0	1	constrictor dose oesophagus inlet muscle dose oesophagus dose base of tongue dose supraglottic larynx dose parotids dose submandibular glands dose	constrictor dose supraglottic larynx dose	N/A	0	multivariate			multivariate										multivariate		univariate	univariate	univariate	univariate	univariate
{Christianen, 2016 #274}	101	186	186	8	100	?	38.70967742	?	Dysphagia	0	RTOG G2+	1					N/A				1	0	6 months	0	1	N/A	N/A	NTCP models	1				model										model
{Deantonio, 2013 #208}	121	50	50	10	100	?	70	3DCRT, IMRT	Dysphagia	1	CTCAEv4 G3+		1				0.04		0.04		1	0	late	0	1	constrictor dose tumour site	N/A	N/A	0	multivariate		multivariate			univariate
{Dirix, 2009 #73}	122	53	53	?	100	?	100	?	Dysphagia	0	EORTC, H&N35, MDADI					1	N/A				0	1	median 20 months FU	0	1	constrictor dose larynx dose tumour site t stage pretreatment dysphagia	pretreatment dysphagia	N/A	0	univariate					univariate				univariate		multivariate		univariate
{Eisbruch, 2011 #117}	124	73	73	0	100	?	100	IMRT	Dysphagia	0	HNQOL + UWQOL					1	N/A				0	1	3,12,24 months post RT	0	1	constrictor dose glottic/supraglottic larynx dose oesophagus dose	N/A	N/A	1	univariate													univariate		univariate
{Frowen, 2013 #1420}	126	55	55	0	100	?	84	?	Dysphagia	0	VFSS				1		N/A				1	0	3 and 6 months	0	1	constrictor dose	constrictor dose	N/A	0	multivariate	multivariate	multivariate	multivariate
{Ghadjar, 2012 #577}	128	213	213	?	100	?	53	?	Dysphagia	1	RTOG G3+		1				0.4		0.4		1	0	late	0	1	N/A	N stage acute dysphagia weight loss hemoglobin resectable disease	N/A	0											multivariate
{Goepfert, 2017 #160}	129	116	116	0	100	?	100	IMRT	Dysphagia	0	MDADI					1	N/A				0	1	Late	0	1	T stage N stage Smoking status	T stage Smoking status	N/A	0										multivariate	univariate				multivariate
{Guo, 2016 #121}	130	96	96	0	100	19	83	IMRT	Dysphagia	0	Royal Brisbane Hospital Outcome Measure for Swallowing and Performance Status Scale						N/A				1	0	> 3months	0	1	supraglottic larynx dose glottic larynx dose cricopharyngeus oesophageal inlet muscle	supraglottic larynx dose glottic larynx dose cricopharyngeus oesophageal inlet muscle	N/A	0	multivariate	multivariate												multivariate			multivariate
{Haderlein, 2014 #633}	131	45	45	0	100	?	100	?	Dysphagia	1	EORTC QLQ-C30					1	N/A				0	1	late	0	1	alcohol constrictor dose	N/A	N/A	1	univariate
{Harms, 2019 #610}	132	81	81	0	100	6	91	?	Dysphagia	1	tube feeding			1			0.111111111	0.111111111			1	0	median 5.6 years	0	1	T stage	N/A	N/A	0										multivariate
{MD Anderson Head and Neck Cancer Symptom Working Group, 2016 #2613}	105	300	300	0	100	?	100	IMRT	Dysphagia	1	aspiration /stricture / tube feeding / aspiration pneumonia			1	1		0.11	0.11			1	0	> 12 months post RT	0	1	mylogeniohyoid complex dose genioglossus dose digastrics dose constrictor dose	N/A	age mylogeniohyoid dose	0	multivariate		multivariate	multivariate			model													model
{Jensen, 2007 #103}	133	35	35	0	100	?	?	?	Dysphagia	0	H&N Swallowing Scale					1	N/A				0	1		0	1	supraglottic region dose	N/A	N/A	1														univariate
{Kalendralis, 2022 #566}	102	277	277	?	100	?	?	?	Dysphagia	1	CTCAE G2+	1					0.31			0.31	1	0	6 months	0	1	N/A	N/A	NTCP model	1		model	model	model		model			model			model
{Kanayama, 2018 #10}	134	122	122	?	100	?	83	IMRT	Dysphagia	1	Tube feeding dependence			1			0.057	0.057			1	0	6 months	0	1	treatment delivery details	larynx dose parotid dose tongue dose	N/A	0														multivariate				multivariate		multivariate
{Kierkels, 2016 #8}	136	100	100	?	100	?	38	IMRT	Dysphagia	1	RTOG/EORTC G2+	1											6 months post RT	0	1	plan type parotid dose cricopharnygeal dose esophageal inlet dose oral cavity dose	N/A	N/A	1	model			model					univariate					model			univariate	univariate
{Kimura, 2020 #46}	137	117	117	?	100	100	100	3D-CRT or IMRT	Dysphagia	1	Tube feeding			1			47.90%	0.479			?	?	1 year after end RT	0	1	surgery type tumour site	surgery type tumour site	N/A	0						multivariate						univariate
{Langendijk, 2009 #199}	139	529	529	20	100	26	10	Accelerated RT, RT	Dysphagia	1	RTOG G2+	1					0.23			0.23	1	0	6 months	0	1	gender age T stage N stage tumour site treatment neck irradiation baseline dysphagia baseline weight loss	T3+ bilateral irradiation weight loss tumour site treatment	T3+ bilateral irradiation weight loss tumour site treatment	1						model	univariate	univariate		model	univariate	univariate
{Lango, 2010 #2136}	140	67	67	0	100	?	84	?	Dysphagia	1	tube feeding dependence			1			N/A				1	0	late	0	1	neck dissection	neck dissection	N/A	0
{Levendag, 2007 #35}	142	56	56	0	100	?	?	?	Dysphagia	0	EORTC H&N35, MDADI					1	N/A				0	1	mean follow up 18 months	0	1	constrictor mean dose	brachytherapy dose	N/A	0	univariate		univariate	univariate
{Li, 2009 #85}	143	39	39	?	100	?	100	IMRT	Dysphagia	1	tube feeding dependence			1			N/A				1	0	6 months	0	1	constrictor dose oesophageal inlet dose	N/A	constrictor dose oesophageal inlet dose	1	model	model															model
{Liu, 2022 #757}	145	106	106	?	100	33	81	?	Dysphagia	0	Penetration Aspiration Score VFSS				1		N/A				1	0	median 6 months	0	1	age t stage tumour site swallowing metrics	age swallow metrics t stage	N/A	0						multivariate	univariate			multivariate	multivariate
{Loser, 2022 #19}	147	61	61	?	100	?	?	?	Dysphagia	1	tube feeding			1			0.672	0.672			1	0	median 25 months	0	1	larynx dose KPS tumour site	larynx dose	N/A	0														multivariate
{Machtay, 2008 #465}	148	230	230	0	100	?	100	?	Dysphagia	1	RTOG G3+		1				0.43		0.43		1	0	3 yrs	0	1	N/A	age T stage tumour site neck dissection	N/A	0						multivariate	multivariate			multivariate
{Mattei, 2022 #691}	150	217	217	0	100	18	82	ext beam RT	Dysphagia	0	Dysphagia Outcome and Severity Scale (DOSS)						N/A				1	0	N/A	0	1	Comorbidity level N stage Treatment Karnovsky Performance Score	Comorbidity level N stage	N/A	0											multivariate
{Mortensen, 2013 #53}	155	259	259	?	100	?	63	IMRT	Dysphagia	1	G3+ Dahanca score						0.08				1	0	?	0	1	constrictor dose	N/A	N/A	1	univariate
{Mouw, 2010 #680}	156	222	222	?	100	?	100	?	Dysphagia	1	custom swallowing score						N/A				1	0	late	0	1	age performance status tumour site neck dissection	N/A	N/A	1						univariate	model
{Murono, 2015 #2093}	157	75	75	0	100	?	100	?	Dysphagia	1	tube feeding dependence			1			0.16	0.16			1	0	6 months	0	1	tumour site t stage	tumour site	N/A	0						univariate	multivariate			univariate
{Nevens, 2018 #419}	158	63	63	?	100	?	?	?	Dysphagia	0	Penetration Aspiration Scale, Swallowing Performance Scale				1		N/A				1	0	6, 12 months	0	1	Total Dysphagia Risk Score (TDRS)	N/A	N/A	1
{Nguyen, 2009 #2080}	159	46	46	0	100	?	100	?	Dysphagia	1	aspiration				1		0.54				1	0	median 5 months	0	1	T stage N stage	N/A	N/A	1										univariate	univariate
{Orlandi, 2019 #77}	160	148	148	0	100	?	100	IMRT / VMAT	Dysphagia	0	MDADI score					1	N/A				0	1	6 months	0	1	Gender HPV status xerostomia	Gender HPV status xerostomia	N/A	0								multivariate
{Ortigara, 2019 #340}	161	88	88	0	100	?	93.2	3D CRT	Dysphagia	0	MDADI					1	N/A				0	1	> 3 months post RT	0	1	tumour site	N/A	N/A	0						multivariate
{Ottosson, 2014 #594}	162	101	101	?	100	?	?	?	Dysphagia	1	aspiration				1		0.48				1	0	mean 71.6 months	0	1	weight loss BMI	N/A	N/A	1
{Petersson, 2021 #64}	163	94	94	?	100	?	89	ext.beam.RT +- brachytherapy	Dysphagia	1	PAS>=5 OR MDADI <= 60				1	1					1	1	mean 12.7 months	0	1	tumour site BMI overweight weight loss since RT	N/A	N/A	0						multivariate
{Petras, 2019 #55}	164	29	29		100	?	100	IMRT	Dysphagia	1	aspiration				1		0.34				1	0	late	0	1	aryepigglotic folds dose \	aryepigglotic folds dose \	N/A	0														multivariate
{Prameela, 2016 #1784}	166	20	20	?	100	?	50		Dysphagia	0	Uni Washington H&N QOL questionnaire					1	N/A				0	1	> 6 months	0	1	constrictor dose larynx dose base of tongue dose	N/A	N/A	1
{Pu, 2022 #94}	167	44	44	44	100	?	93	IMRT	Dysphagia	0	VFSS				1		N/A				1	0	mean 68 months	0	1	constrictor dose cricopharynx dose glottic larynx dose base of tongue dose genioglossus dose gender T stage N stge	N/A	N/A	1	univariate	univariate	univariate	univariate				univariate		univariate	univariate			univariate			univariate			univariate
{Rwigema, 2019 #211}	169	205	205	0	100	?	?	IMRT, Proton Beam Therapy	Dysphagia	1	CTCAEv4 G3+		1				0.23		0.23		1	0	6 months	0	1	N/A	N/A	Baseline weight loss > 10% Oral cavity dose T3+	1	model	model		model					model	model
{Salama, 2008 #604}	172	95	95	4	100	?	100	?	Dysphagia	0	swallowing performance scale				1						1	0	1-2 months after RT	0	1	T stage ECOG	N/A	N/A	1										univariate
{Schwartz, 2010 #230}	174	31	31	0	100	?	42	IMRT	Dysphagia	0	OPSE						N/A				1		6-24 months	0	1	tumour site	oral cavity dose constrictor dose	N/A	0	multivariate			multivariate		univariate			multivariate
{Setton, 2015 #1969}	175	2315	2315	0	100	?	58.1	IMRT	Dysphagia	1	tube feeding dependence			1			0.07	0.07			1	0	late	0	1	N/A	age smoking N stage chemotherapy	N/A	0					univariate	univariate	multivariate				multivariate				multivariate
{Soderstrom, 2017 #291}	100	124	124	0	100	0	0	3DCRT, IMRT	Dysphagia	1	Aspiration by videofluoroscopy				1		0.47				1	0	median 67 months	0	1	constrictor dose age neck dissection	N/A	N/A	1	univariate	univariate	model		univariate		model							univariate						univariate
{Truong, 2012 #1511}	178	15	15	2	100	?	87	IMRT	Dysphagia	1	CTCAEv3 G3+		1				0.47		0.47		0	1	up to 44 months	0	1	CT perfusion blood flow (constrictor) CT perfusion blood volume (constrictor)	CT perfusion blood flow (constrictor) CT perfusion blood volume (constrictor)	N/A	1
{Tsai, 2017 #167}	179	424	424	295	100	?	100	?	Dysphagia	1	CTCAEv3 G3+		1				0.05		0.05		1	0	late	0	1	constrictor dose tumour site age	N/A	N/A	0	multivariate	multivariate	multivariate	multivariate		multivariate	multivariate
{Ursino, 2021 #83}	180	38	38	10	100	?	?	?	Dysphagia	1	Penetration or aspiration (PAS)				1		0.305				1	0	6 months	0	1	base of tongue dose constrictor dose parotid glands dose	N/A	N/A	1	model	model	model	model										model		model	model	model		model
{van der Laan, 2015 #42}	181	260	260	18	100	0	29	3DCRT, IMRT	Dysphagia	1	EORTC/RTOG G2+	1					0.24			0.24	1	0	6 months	0	1	acute toxicities	acute xerostomia acute dysphagia	acute xerostomia acute dysphagia	1	model			model										model
{van der Molen, 2013 #140}	182	55	55	?	100	?	100	?	Dysphagia	0	Penetration Aspiration Scale				1		?				1	0	10 weeks post treatment, 1 year post treatment	0	1	constrictor dose masseter dose	N/A	N/A	1	univariate	univariate				univariate
{Wentzel, 2020 #380}	106	200	200	0	100	0	89	IMRT	Dysphagia	1	Tube feeding OR aspiration			1	1		0.17	0.17			1	0	6 month	0	1	T-stage dose-distance clusters	N/A	N/A	1	model		model			model	model		model	model	model				model
{Wentzel, 2021 #551}	186	528	528	0	100	?	87	?	Dysphagia	1	Feeding tube at 6 months			1			0.17	0.17			1	0	6 month	0	1	lymph node similarity	N/A	lymph node similarity N stage	1							model			model	model				model
{Wopken, 2014 #3}	104	610	610	?	100	?	22	3DCRT, IMRT	Dysphagia	1	RTOG G3+		1				0.069		0.069		1	0	12 months	0	1	N/A	N/A	preTx weight loss T stage N stage bilateral neck irradiation treatment modality	1										model	model
{Wopken, 2014 #6}	107	355	355	17	100	?	?	3DCRT, IMRT	Dysphagia	1	Tube feeding			1			0.107	0.107			1	0	6 months	0	1	N/A	N/A	T stage weight loss treatment modality constrictor dose parotid dose cricopharyngeal muscle dose	1	model	model		model						model							model	model
{Alexidis, 2022 #305}	108	123	123	19	100	?	62		Dysphagia	1	RTOG Grade 2+	1					0.504065041			0.504065041	1	0	acute	1	0	mean dose to constrictors chemotherapy tumour site therapy type type of neck irradiation	mean dose to constrictors chemotherapy tumour site	NA	1	model	model	model	model	univariate	model
{Alexidis, 2022 #305}	108	123	123	19	100	?	62		Dysphagia	1	PEG indication			1			0.195121951	0.195121951			1	0	acute	1	0	therapy type tumour site	therapy type tumour site	NA	1						model
{Al-Othman, 2003 #578}	109	212	212	?	100	?	?	N/A	Dysphagia	1	Tube feeding			1			0.225	0.225			1	0	acute + late	1	0	higher RT dose adjuvant chemo advanced age presence of neck disease	N/A	N/A	0					univariate	univariate	multivariate	univariate	univariate
{Anderson, 2018 #1765}	110	139	139	0	100	0	?	IMRT	Dysphagia	1	feeding tube use			1			0.73	0.73			1	0	week 8	1	0	tumour site T stage N stage chemo type prior dysphagia / malnutrition	t stage N stage	N/A	1					univariate	univariate	univariate			model	univariate	univariate
{Barnhart, 2017 #32}	112	80	80	6	100	?	60	IMRT / CRT	Dysphagia	1	Tube feeding			1			0.3	0.3			1	0	1 month post RT	1	0	Tumour site Treatment Neck treatment	Treatment Neck treatment	N/A	0						univariate
{Barnhart, 2017 #32}	112	80	80	6	100	?	60	IMRT / CRT	Dysphagia	0	FOIS					1	61% FOIS < 6				0	1	1 month post RT	1	0	tumour site treatment neck Tx	neck Tx	N/A	0
{Caglar, 2008 #660}	116	96	96	11	100	?	91	IMRT	Dysphagia	1	Aspiration / stricture				1		0.345				1	0	< 8 weeks after RT	1	0	larynx dose constrictor dose smoking history	N/A	N/A	1	univariate	univariate												univariate	univariate
{De Ruyck, 2013 #138}	94	189	189	?	100	22.2	75	IMRT	Dysphagia	1	CTCAEv3 G3+ dysphagia		1				0.28		0.28		1	0	During Tx	1	0	CCRT constrictor dose gene single nucleotide polymorphism	CCRT constrictor dose gene single nucleotide polymorphism	CCRT constrictor dose gene single nucleotide polymorphism	1	model			model	univariate
{Dean, 2018 #225}	98	263	263	?	100	?	?	varies	Dysphagia	1	CTCAEv3 G3+		1				0.6		0.6		1	0	?	1	0	N/A	N/A	disease site CCRT age pharyngeal mucosa dose	1					univariate	model	model	model
{Deneuve, 2022 #131}	89	36	36	0	100	100	?	IMRT or VMAT or helical tomotherapy	Dysphagia	1	CTCAEv4 G3+		1				0.333		0.333		1	0	acute	1	0	N/A	N/A	RADIODTECT (blood test) oral cavity dose larynx dose constrictor dose	1	model	model	model	model					model					model
{Eisbruch, 2007 #105}	123	36	36	5	100	?	100	IMRT/brachytherapy	Dysphagia	0	HN-QOL + RTOG, H&N35, MDADI					1	?				1	1		1	0	constrictor dose larynx dose RT delivery type	RT delivery type	N/A	1	univariate			univariate										univariate
{Feng, 2007 #49}	125	36	36	5	100	?	100	IMRT	Dysphagia	0	videofluoroscopy HNQOL				1		N/A				1	1	early	1	0	constrictor dose supraglottic larynx dose	N/A	N/A	1	univariate			univariate										univariate
{Fua, 2007 #39}	127	28	28	28	100	?	82	IMRT	Dysphagia	1	G3+ CTCAEv2		1				0.85		0.85		1	0	acute	1	0	IMRT subtype	N/A	N/A	1
{Gaito, 2021 #16}	96	225	225	8	100	?	91.6	?	Dysphagia	1	tube feeding			1			0.396	0.396			1	0	acute	1	0	tumour site T stage chemotherapy parotid dose	tumour site T stage chemotherapy parotid dose	N/A	1					univariate	model				model								model
{Karsten, 2019 #13}	135	336	336	17	100	?	100	?	Dysphagia	1	Tube feeding dependence			1			0.45	0.45			1	0		1	0	N/A	N/A	BMI weight loss FOIS T stage	1										model
{Koiwai, 2009 #18}	138	47	47	7	100	?	100		Dysphagia	1	CTCAEv3 G3+		1				0.47		0.47		1	0	acute	1	0	age ECOG pretreatment weight loss smoking tumour site T stage radiation portal size chemo dose fractionation	radiation portal size	N/A	0					univariate	univariate				univariate	univariate				univariate
{Lim, 2021 #429}	144	21	21	?	100	?	76	VMAT	Dysphagia	0	MDADI					1	N/A				0	1	post RT	1	0	Salivary gland dose change in volume of custom neck + mandible ROI change in transit fluence within ROI	N/A	N/A	1
{Logemann, 2006 #542}	146	53	53	3	100	?	100	?	Dysphagia	0	Videofluoroscopy assessment				1		N/A				1	0	3 month	1	0	Disease site	N/A	N/A	1						univariate
{Mazzola, 2014 #1956}	151	56	56	0	100	?	54	N/A	Dysphagia	0	EORTC/RTOG						N/A				1	0	acute	1	0	constrictor dose	N/A	N/A	1	univariate		univariate
{Mierzwa, 2021 #129}	152	32	32	0	100	?	100		Dysphagia	1	Tube feeding			1			0.22	0.22			1	0	3 months	1	0	blood volume change in constrictor constrictor dose	N/A	N/A	1
{Monti, 2017 #567}	153	42	42	?	100	?	?	3DCRT, IMRT	Dysphagia		CTCAEv4 G3+		1				0.214285714		0.214285714		1	0	acute	1	0	cricopharnyx dose esophagus dose	N/A	N/A	1																univariate	univariate
{Mortensen, 2013 #427}	154	1461	1461	?	100	?	?	?	Dysphagia	1	DAHANCA						N/A				1	0	acute	1	0	RT type T stage N stage tumour site age pretreatment dysphagia	RT type T stage N stage tumour site age pretreatment dysphagia	N/A	1						model	model	univariate		model	model	model
{Otter, 2015 #1828}	90	253	253	41	100	?	87	?	Dysphagia	1	CTCAEv3 G3+		1				0.5		0.5		1	0	acute	1	0	N/A	constrictor dose CCRT sex	constrictor dose CCRT sex	0	multivariate	multivariate			univariate
{Poulsen, 2008 #57}	165	343	343	0	100	?	?	CRT / ART	Dysphagia	1	Dische score G4+ (tube feeding or IV)						0.26				1	0	acute	1	0	treatment field length	N/A	N/A	1										model	model
{Ray, 2021 #599}	168	99	99	1	100	?	?	?	Dysphagia	0	CTCAE						N/A				1	0	< 6 weeks from end RT	1	0	cancer type pharynx dose pharyngeal muscle dose cricopharyngeaus dose	N/A	N/A	0	multivariate	multivariate	multivariate	multivariate		multivariate									multivariate		multivariate
{Sachdev, 2015 #24}	170	100	100	9	100	?	97	IMRT	Dysphagia	1	Tube Feeding			1			0.33	0.33			1	0	Mostly acute	1	0	age chemo regime twice-daily RT	age	N/A	0					univariate		multivariate
{Saito, 2020 #126}	171	138	138	?	100	?	100	?	Dysphagia	1	RTOG G3+		1				0.37		0.37		1	0	acute	1	0	oral candidiasis (bacteria)	oral candidiasis (bacteria)	N/A	0
{Sanguineti, 2011 #1958}	173	59	59	0	100	?	?	IMRT	Dysphagia	1	Tube feeding			1			0.373	0.373			1	0	acute	1	0	Oral mucosa dose	Oral mucosa dose	N/A	0	univariate		univariate	univariate					multivariate
{Srivastava, 2022 #370}	91	51	51	0	100	?	100	?	Dysphagia	1	RTOG G3+		1				0.43		0.43		1	0	during RT	1	0	PD-L1_tumour (tumour protein from biopsy) PD-L1-TILs	N/A	N/A	1
{Strom, 2013 #1808}	176	128	128	0	100	?	100	IMRT	Dysphagia	1	PEG tube placement			1			0.117	0.117			1	0	within 3 months	1	0	N/A	RT delivery details T stage chemo details BMI	N/A	0					multivariate					multivariate
{Vidyasagar, 2020 #640}	184	60	60	?	100	33	78	3DCRT/IMRT	Dysphagia	0	PRO MDASI-HN					1					0	1	week 5	1	0	tumour site	N/A	N/A	1						univariate
{Wang, 2022 #638}	185	319	319	319	100	0	81	IMRT	Dysphagia	1	RTOG/EORTC G2+	1									1	0	acute	1	0	genetic markers age sex BMI smoking stage EBV status RT regimen	genetic markers age sex BMI smoking stage EBV status RT regimen	genetic markers age sex BMI smoking stage EBV status RT regimen	1							model	model		model	model				model
{Werbrouck, 2009 #1933}	92	88	88	0	100	26.13636364	39.77272727	IMRT	Dysphagia	1	CTCAE G3+		1				0.318181818		0.318181818		1	0	during RT	1	0	constrictor dose genetic polymorphism	N/A	constrictor dose genetic polymorphism	1	model	model	model	model
{Willemsen, 2020 #11}	97	450	450	31	100	?	100	?	Dysphagia	1	tube feeding 4 weeks+			1			0.65	0.65			1	0	acute?	1	0	BMI age baseline adjusted diet baseline weight loss TNM stage treatment type submandibular gland dose parotids dose	BMI baseline adjusted diet baseline weight loss treatment type submandibular gland dose parotids dose	BMI baseline adjusted diet baseline weight loss TNM stage treatment type submandibular gland dose parotids dose	1					univariate	model	univariate			model	model							model	model
{Willemsen, 2022 #12}	95	409	409	35	100	?	100	?	Dysphagia	1	tube feeding 4 weeks+			1			?				1	0	acute?	1	0	N/A	baseline adjusted diet baseline weight loss ECOG tumour site N stage parotid dose oral cavity dose	baseline adjusted diet baseline weight loss ECOG tumour site N stage parotid dose oral cavity dose	0						multivariate			multivariate		multivariate							multivariate
{Yang, 2016 #1906}	187	192	192	22	100	?	80	IMRT	Dysphagia	1	Feeding tube placement / use			1			0.57	0.57			1	0	mostly acute	1	0	gender N stage pre-Tx swallowing problems CCRT pre-Tx Karnovsky Performance Score Previous Surgery Chemo regime	gender N stage preTx dysphagia CCRT Karnovsky Performance Score Previous surgery	KPS chemo preTx dysphagia	0					univariate			multivariate			multivariate	multivariate
{Bhayani, 2013 #1864}	114	474	474	0	100	?	100		Dysphagia	1	Gastronomy tube placement			1			0.62	0.62			1	0		1	1	T stage RT type CCRT	CCRT	N/A	0					univariate					univariate		univariate
{Charters, 2022 #1759}	119	106	106	11	100		61		Dysphagia	0	FOIS, EAT-10, Yale swallow protocol					1	N/A				1	1	up to 24 months post RT	1	1	N/A	age smoking larynx dose t stage CCRT constrictor dose oesophagus dose esophageal inlet dose	N/A	0	multivariate	multivariate		multivariate	univariate		multivariate			multivariate				multivariate	multivariate	multivariate	multivariate
{Lee, 2006 #180}	141	199	199	0	100	?	100	?	Dysphagia	1	stricture				1		0.21				1	0	?			twice daily fractionation gender tumour site	twice daily fractionation gender tumour site	N/A	0						multivariate		multivariate		multivariate
{Mangar, 2006 #2872}	149	160	160	6	100	?	?	?	Dysphagia	1	enteral feeding			1			0.3125	0.3125			1	0	?			N/A	BMI performance status T stage weight loss (pretx) serum albumin + protein age smoking	N/A	0							multivariate			multivariate	multivariate				multivariate
{Teguh, 2013 #237}	177	434	434	92	100	?	29	3D-CRT, IMRT, Parallel-opposed	Dysphagia	1	H&N35 score > 0					1	0.66				0	1	?			tumour site disease site N stage chemotherapy bilateral neck irradiation treatment dose	age bilateral neck irradiation treatment dose T stage tumour site	N/A	1					univariate	model	univariate			model
{Yahya, 2022 #436}	99	90	90	?	100	?	100	3DCRT	Dysphagia	1	improvement in CTCAE										1	0	?			N/A	N/A	larynx dose	1														model
{Best, 2011 #132}	113	67	67	0	100	?	100		Dysphagia	1	Stricture - DOSS						0.19				1	0	mostly acute			tumour location neck dissection mucositis duration	duration of mucositis	N/A	0						univariate							multivariate
{Vangelov, 2017 #15}	183	131	131	0	100	?	64	?	Dysphagia	1	tube feeding use			1							1	0				CCRT bilateral lymph node irradiation	CCRT bilateral neck irradiation	N/A	0					univariate
{Alexidis, 2023 #2927}	188	160	160	0	100	57.5	100	VMAT	Dysphagia	1	RTOG grade 2+	1					0.475			0.475	1	0	3 months of RT	1	0	mean constrictor dose vol in primary GTV receiving dose > 60Gy	mean constrictor dose vol in primary GTV receiving dose > 60Gy	N/A	0	multivariate
{Beddok, 2023 #2930}	189	23	23	7	100	?	?	varies	Dysphagia	1	CTCAEv5 grade 2+	1					0.65			0.65	1	0	median 41 months	0	1	dose to pharyngeal constrictor muscles	N/A	N/A	1	univariate
{Vasquez Osorio, #2940}	189	104	104	0	100	?	74	?	Dysphagia	1	various					1						1	1 year		1	dose to inferior brain stem	dose to inferior brain stem MPC dose SPC dose	dose to inferior brain stem MPC dose SPC dose	1			model	model
[truncated: 26 more columns]
